# Supplementary material for: Flavonoid Interaction with a Chitinase from Grape Berry Skin: Protein Identification and Modulation of the Enzymatic Activity
Source: PubMed Central journal article supplement (PMC6273270; doi:10.3390/molecules21101300), 2016-09-28
Supplement: molecules-21-01300-s001.pdf [file molecules-21-01300-s001.pdf]

## Supplementary Materials: Flavonoid Interaction with a Chitinase from Grape Berry Skin: Protein Identification and Modulation of the Enzymatic Activity

Antonio Filippi, Elisa Petrusa, Uros Rajcevic, Vladka Čurin Šerbec, Sabina Passamonti, Giovanni Renzone, Andrea Scaloni, Marco Zancani, Angelo Vianello and Enrico Braidot

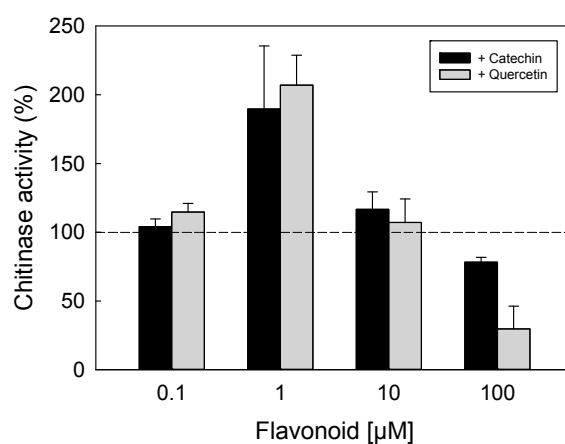

**Figure S1.** QC and CA modulation of the chitinase activity of *S. griseus*. Chitinolytic activity was measured as described in Magnin-Robert et al. [13]. Different concentrations of CA (black bars) and QC (grey bars) were tested on chitinase from *S. griseus*. The values are expressed as percentage respect to the control, represented by the 100% of activity (dashed line).
